# Supplementary material for: Antibody-drug conjugates in breast cancer: overcoming resistance and boosting immune response
Source: PubMed Central journal article supplement (PMC10503805; doi:10.1172/jci172156), 2023-09-15
Supplement: jci-133-172156-s154.pdf [file jci-133-172156-s154.pdf]

| Pharmaceutical Company | Target                       | Drug                                                             | Combination                                                                                                         | Indication                                            | Phase | Identifier  | Results                                                                                   |
|------------------------|------------------------------|------------------------------------------------------------------|---------------------------------------------------------------------------------------------------------------------|-------------------------------------------------------|-------|-------------|-------------------------------------------------------------------------------------------|
| Seagen                 | CD30                         | Brentuximab vedotin                                              | + Pembrolizumab                                                                                                     | R/R Metastatic Tumors with PD-L1 positivity           | I/II  | NCT04609566 | None, Primary Endpoint: ORR                                                               |
| Seagen                 | Nectin-4                     | Enfortumab vedotin monotherapy                                   |                                                                                                                     | Advanced/Metastatic Solid Tumors                      | I/II  | NCT04225117 | None, Primary Endpoint: ORR                                                               |
| Seagen                 | LIV-1                        | Ladiratumumab vedotin                                            | +/- Pembrolizumab                                                                                                   | Metastatic TNBC and R/R Metastatic breast cancer      | I/II  | NCT03310957 | None, Primary Endpoint: ORR                                                               |
| Seagen                 | CD228A                       | SGN-CD228A                                                       |                                                                                                                     | R/R Solid Tumors                                      | I     | NCT04042480 | None, Primary Endpoint: number of AE, lab abnormalities, DLTs                             |
| Seagen                 | Integrin beta-6              | SGN-B6A                                                          |                                                                                                                     | R/R Solid Tumors                                      | I     | NCT04389632 | None, Primary Endpoint: AE, lab abnormalities, DLTs                                       |
| Seagen                 | Sialyl Thomsen-nouveau (STn) | SGN-STNV                                                         |                                                                                                                     | R/R Solid Tumors                                      | I     | NCT04665921 | None, Primary Endpoint: AE, lab abnormalities, DLTs                                       |
| Seagen                 | B7-H4                        | SGN-B7H4V                                                        |                                                                                                                     | R/R Solid Tumors                                      | I     | NCT05194072 | None, Primary Endpoint: AE, lab abnormalities, DLTs                                       |
| Seagen                 | PD-L1                        | SGN-PDL1V                                                        |                                                                                                                     | Advanced Solid Tumors                                 | I     | NCT05208762 | None, Primary Endpoint: AE, lab abnormalities, DLTs                                       |
| Seagen/Genetech        | HER2                         | Trastuzumab Emtansine (T-DM1)                                    | + Tucatinib                                                                                                         | Metastatic HER2+                                      | II    | NCT05673928 | None, Primary Endpoint: intracranial antitumor activity                                   |
| Daiichi Sankyo         | HER2                         | Trastuzumab deruxtecan (T-DXd)                                   | + AZD5305 (PARPi)                                                                                                   | Solid Tumors                                          | I     | NCT04644068 | None, Primary Endpoint: AE, DLTs                                                          |
| Daiichi Sankyo         | TROP2                        | Dato-DXd                                                         | + AZD5305 (PARPi)                                                                                                   | Solid Tumors                                          | I     | NCT04644068 | None, Primary Endpoint: AE, DLTs                                                          |
| Daiichi Sankyo         | HER3                         | Patritumab deruxtecan (HER3-DXd)                                 |                                                                                                                     | HER3+ Metastatic Breast Cancer                        | I     | NCT04965766 | None, Primary Endpoint: ORR                                                               |
| Daiichi Sankyo         | HER2                         | Trastuzumab deruxtecan (T-DXd)                                   | + Durvalumab<br>+ Paclitaxel<br>+ Pertuzumab<br>+ Tucatinib                                                         | HER2+ Metastatic Breast Cancer                        | I/II  | NCT04538742 | Primary Endpoint: AE<br>R2PD combinations were the standard doses of each individual drug |
| Daiichi Sankyo         | HER2                         | Trastuzumab deruxtecan (T-DXd) vs. Trastuzumab Emtansine (T-DM1) |                                                                                                                     | Early Stage HER2+ Breast Cancer with Residual Disease | III   | NCT04622319 | None, Primary Endpoint: IDFS                                                              |
| Daiichi Sankyo         | HER2                         | Trastuzumab deruxtecan (T-DXd)                                   | + Trastuzumab<br>+ Durvalumab<br>+ Paclitaxel<br>+ Capiwasertib<br>+ Anastrozole<br>+ Fulvestrant<br>+ Capecitabine | Metastatic HER2 low Breast Cancer                     | I     | NCT04556773 | Primary Endpoint: AE<br>R2PD combinations were the standard doses of each individual drug |
| Daiichi Sankyo         | TROP2                        | Datopotamab deruxtecan (Dato-DXd)                                |                                                                                                                     | Metastatic TNBC Not Candidate for Immunotherapy       | III   | NCT05374512 | None, Primary Endpoint: PFS, OS                                                           |
| Daiichi Sankyo         | TROP2                        | Datopotamab deruxtecan (Dato-DXd)                                |                                                                                                                     | Metastatic HR+, HER2 Negative Breast Cancer           | III   | NCT05104866 | None, Primary Endpoint: PFS, OS                                                           |
| Daiichi Sankyo         | TROP2                        | Datopotamab deruxtecan (Dato-DXd)                                | + Durvalumab<br>+ Capecitabine<br>+ Pembrolizumab                                                                   | Early Stage TNBC with Residual Disease                | III   | NCT05629585 | None, Primary Endpoint: IDFS                                                              |
| ADC Therapeutics       | AXL                          | Mipasetamab uzoptirine (ADCT-601)                                |                                                                                                                     | Advanced Solid Tumors                                 | I     | NCT05389462 | None, Primary Endpoint: AE, DLTs, dose reduction, dose interruption                       |
| ADC Therapeutics       | KAAG1                        | ADCT-901                                                         |                                                                                                                     | Advanced Solid Tumors                                 | I     | NCT04972981 | None, Primary Endpoint: AE, DLTs, dose reduction, dose interruption                       |
| Sanofi                 | CEACAM5                      | Tusamitamab ravtansine                                           | +/- Gemcitabine                                                                                                     | Metastatic Breast Cancer                              | II    | NCT04659603 | None, Primary Endpoint: antitumor activity, recommended dose                              |
| Gilead                 | TROP2                        | Sacituzumab Govitecan                                            |                                                                                                                     | Metastatic HR+, HER2 negative Breast Cancer           | III   | NCT03901339 | Primary Endpoint: PFS<br>SG (vs TPC) improved median PFS (5.5 vs 4.0m)                    |
| Gilead                 | TROP2                        | Sacituzumab Govitecan                                            |                                                                                                                     | Untreated Metastatic TNBC, PDL-1 negative             | III   | NCT05382299 | None, Primary Endpoint: PFS                                                               |
| Gilead                 | TROP2                        | Sacituzumab Govitecan                                            |                                                                                                                     | Untreated Metastatic TNBC, PDL-1 positive             | III   | NCT05382286 | None, Primary Endpoint: PFS                                                               |
| Gilead                 | TROP2                        | Sacituzumab Govitecan                                            | + Alpelisib                                                                                                         | Metastatic HER2 negative Breast Cancer                | I     | NCT05143229 | None, Primary Endpoint: R2PD                                                              |
| Gilead                 | TROP2                        | Sacituzumab Govitecan                                            | + Pembrolizumab                                                                                                     | Metastatic TNBC (PDL-1 positive)                      | III   | NCT04230109 | None, Primary Endpoint: pCR                                                               |
| Gilead                 | TROP2                        | Sacituzumab Govitecan                                            | + Pembrolizumab                                                                                                     | Metastatic TNBC (PDL-1 negative)                      | II    | NCT04468061 | None, Primary Endpoint: PFS                                                               |
| Gilead                 | TROP2                        | Sacituzumab Govitecan                                            | +/- Pembrolizumab                                                                                                   | Neoadjuvant Early Stage TNBC                          | II    | NCT04230109 | Primary Endpoint: pCR<br>pCR rate with SG alone was 30%                                   |
| Gilead                 | TROP2                        | Sacituzumab Govitecan                                            | + Pembrolizumab                                                                                                     | Early Stage Immunotherapy Resistant TNBC              | II    | NCT05675579 | None, Primary Endpoint: AE                                                                |
| Gilead                 | TROP2                        | Sacituzumab Govitecan                                            | + Pembrolizumab                                                                                                     | Early Stage TNBC with Residual Disease                | III   | NCT05633654 | None, Primary Endpoint: IDFS                                                              |
| Gilead                 | TROP2                        | Sacituzumab Govitecan                                            | + Pembrolizumab                                                                                                     | Metastatic HR+, HER2 negative Breast Cancer           | II    | NCT04448886 | None, Primary Endpoint: PFS                                                               |
| Gilead                 | TROP2                        | Sacituzumab Govitecan                                            | + Magrolimab                                                                                                        | Metastatic TNBC                                       | II    | NCT04958785 | None, Primary Endpoint: AE, DLT, PFS, ORR                                                 |

|                     |       |                               |                 |                                                                   |      |             |                                                                                                                                    |
|---------------------|-------|-------------------------------|-----------------|-------------------------------------------------------------------|------|-------------|------------------------------------------------------------------------------------------------------------------------------------|
| Gilead              | TROP2 | Sacituzumab Govitecan         |                 | HER2 negative Breast Cancer with Brain Metastases                 | II   | NCT04647916 | None, Primary Endpoint: ORR<br>Primary Endpoint: IDFS                                                                              |
| Gilead              | TROP2 | Sacituzumab Govitecan         |                 | Early Stage TNBC with Residual Disease                            | III  | NCT04595565 | SG showed a higher rate of AEs compared to TPC                                                                                     |
| G1 Therapeutics     | TROP2 | Sacituzumab Govitecan         | + Trilaciclib   | Metastatic TNBC                                                   | II   | NCT05113966 | None, Primary Endpoint: PFS                                                                                                        |
| Pfizer              | TROP2 | Sacituzumab Govitecan         | + Talazoparib   | Metastatic TNBC                                                   | I/II | NCT04039230 | Primary Endpoint: DLT<br>Staggered dosing of SG and PARPi was feasible with evidence of clinical activity with objective responses |
| Pfizer              | TROP2 | Sacituzumab Govitecan         | + Avelumab      | Metastatic TNBC                                                   | II   | NCT03971409 | None, Primary Endpoint: BORR                                                                                                       |
| Pfizer              | HER2  | Trastuzumab Emtansine (T-DM1) | + Palbociclib   | Metastatic HER2 positive Breast Cancer                            | II   | NCT03530696 | None, Primary Endpoint: PFS                                                                                                        |
| Genentech           | HER2  | Trastuzumab Emtansine (T-DM1) |                 | Stage I HER2 positive Breast Cancer                               | II   | NCT04893109 | None, Primary Endpoint: CRT, DFS                                                                                                   |
| Genentech           | TROP2 | Sacituzumab Govitecan         | + Atezolizumab  | Early Stage TNBC with Residual Disease                            | II   | NCT04434040 | None, Primary Endpoint: rate of cfDNA                                                                                              |
| Genentech           | HER2  | Trastuzumab Emtansine (T-DM1) | + Vinorelbine   | Metastatic HER2 positive Breast Cancer                            | I/II | NCT02658084 | None, Primary Endpoint: MTD, PFS, AE                                                                                               |
| Hoffmann-La Roche   | HER2  | Trastuzumab Emtansine (T-DM1) | + Atezolizumab  | Metastatic HER2 positive, PDL-1 positive metastatic breast cancer | III  | NCT04740918 | None, Primary Endpoint: PFS, OS                                                                                                    |
| Hoffmann-La Roche   | HER2  | Trastuzumab Emtansine (T-DM1) | + Atezolizumab  | HER2 positive Breast Cancer with Residual Disease                 | III  | NCT04873362 | None, Primary Endpoint: IDFS                                                                                                       |
| Hoffmann-La Roche   | HER2  | Trastuzumab Emtansine (T-DM1) | + Atezolizumab  | Metastatic HER2 positive Breast Cancer                            | II   | NCT02924883 | Primary Endpoint: PFS, AE<br>Addition of atezolizumab did not statistically improve PFS (8.2m vs 6.8m)                             |
| Merck Sharp & Dohme | HER2  | Trastuzumab Emtansine (T-DM1) | + Pembrolizumab | Metastatic HER2 Positive Breast Cancer                            | I    | NCT03032107 | Primary Endpoint: AE<br>No DLT, thus R2PD is full dose pembrolizumab + T-DM1<br>ORR was 20% and median PFS was 9.6 months          |
| Novartis            | HER2  | Trastuzumab Emtansine (T-DM1) |                 | Metastatic HER2 Positive Breast Cancer                            | I    | NCT02038010 | None, Primary Endpoint: DLTs, MTD                                                                                                  |
| Immunogen           | ADAM9 | IMG936                        |                 | Solid Tumors                                                      | I    | NCT04622774 | None, Primary Endpoint: DLT, AE, ORR                                                                                               |

Supplemental Table 1. ADC Pipeline in Breast and Solid Malignancies

**Abbreviations**

DLTs: dose limiting toxicities  
 AE: number of adverse events  
 MTD: maximum tolerated dose  
 CRT: clinically relevant toxicity  
 ORR: overall response rate  
 BORR: best overall response rate  
 PFS: progression free survival  
 OS: overall survival  
 IDFS: invasive disease free survival  
 R2PD: recommended phase 2 dose  
 cfDNA: cell free Deoxyribonucleic Acid  
 TPC: treatment of physician's choice
